# Supplementary material
Source: publisher figshare collection journal article supplement (https://diabetesjournals.figshare.com/ndownloader/files/22679132)

# Clarke Error Grid

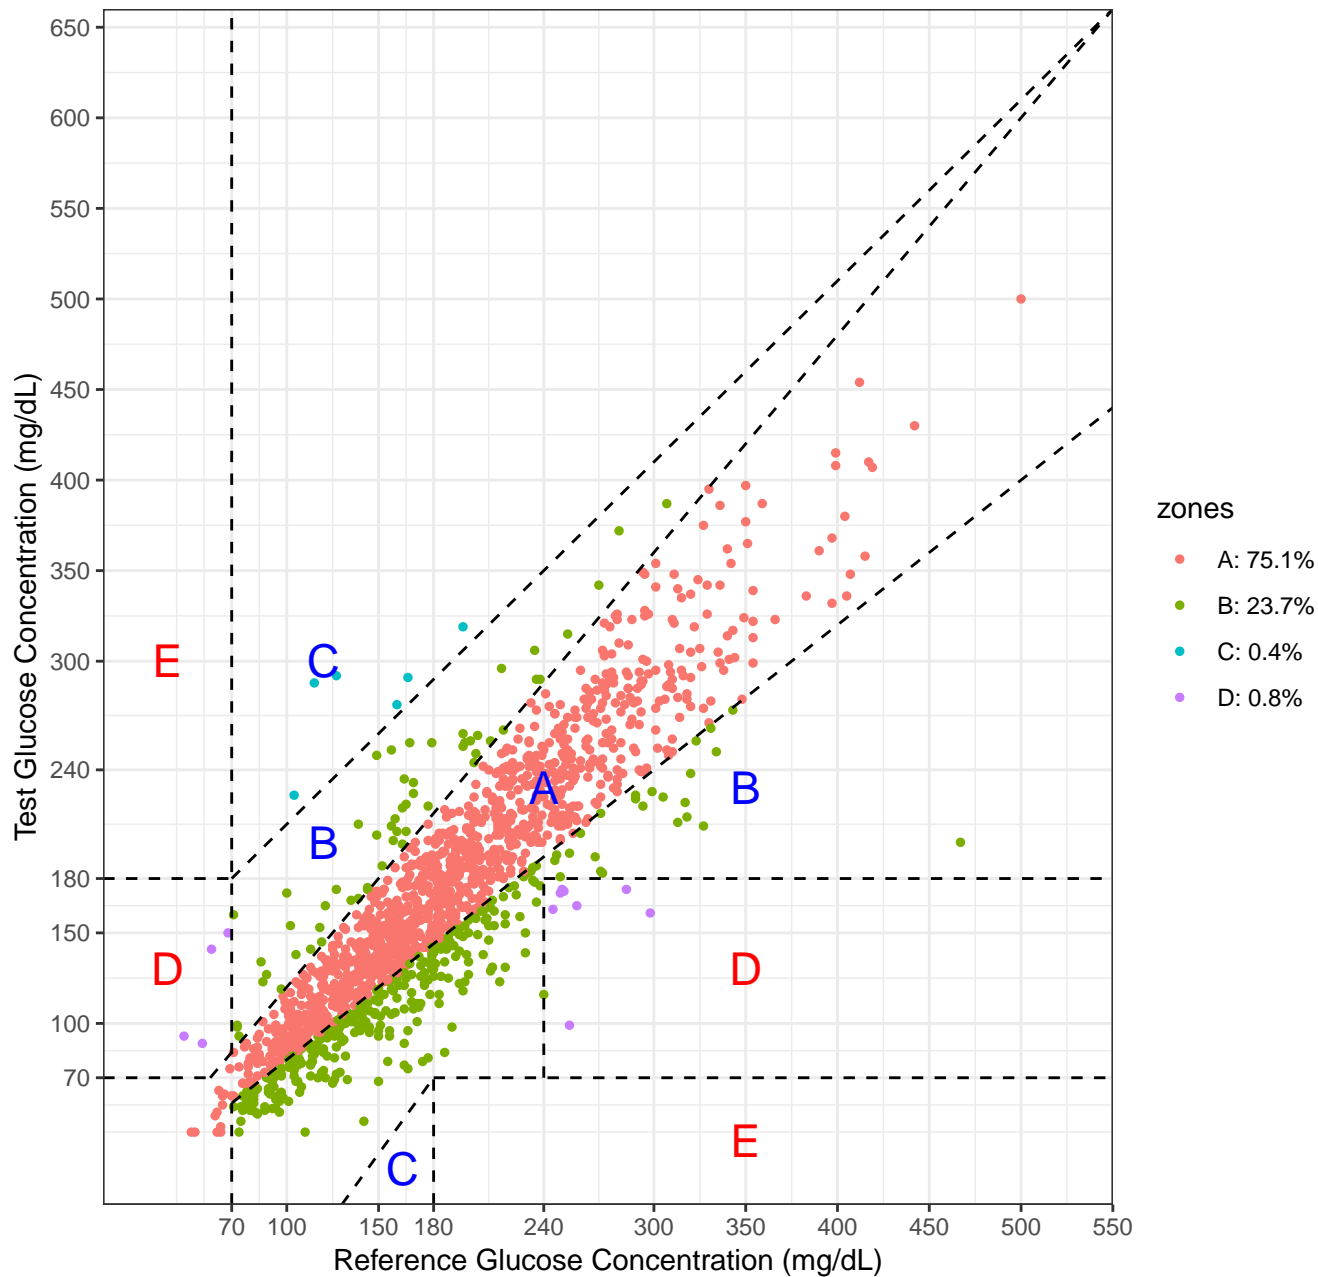

Supplement: Supplementary file 1 [file 22679132]
